# Supplementary material
Source: PubMed Central journal article supplement (PMC1194938)

ASEL-specific  
cell fate marker

ASER-specific  
cell fate marker

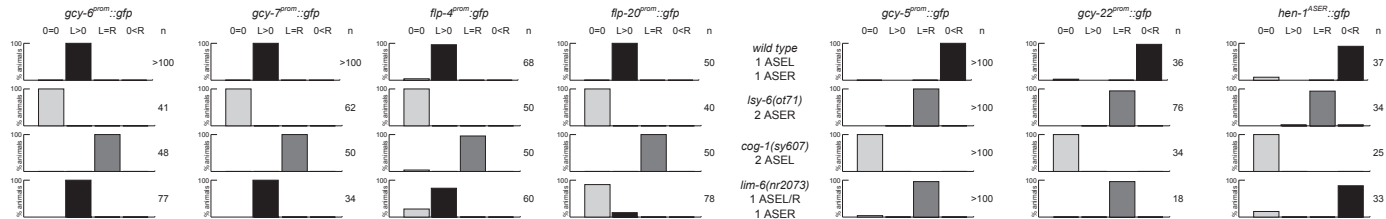

Supplement: pnas_0505530102_1.pdf [file pnas_0505530102_1.pdf]

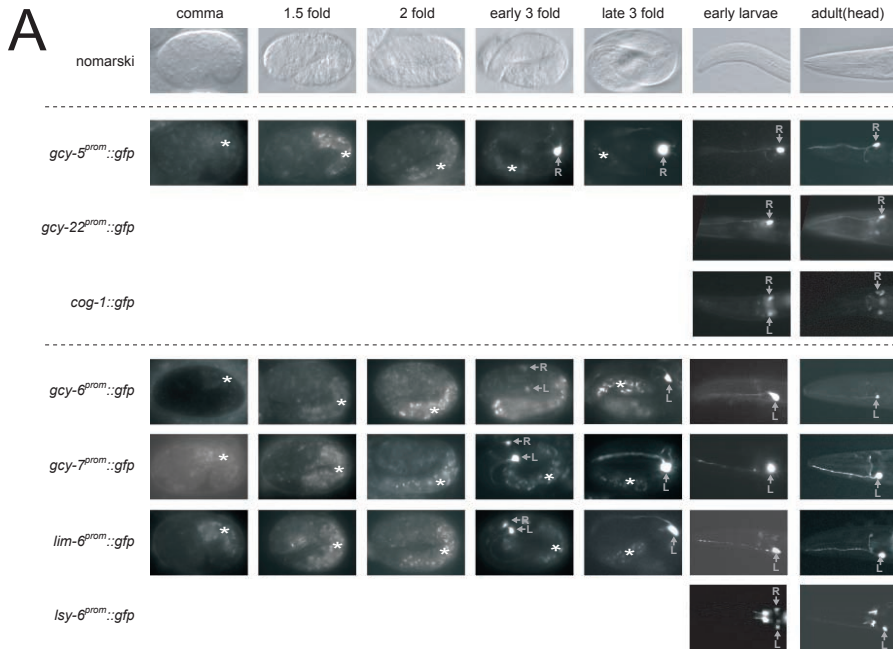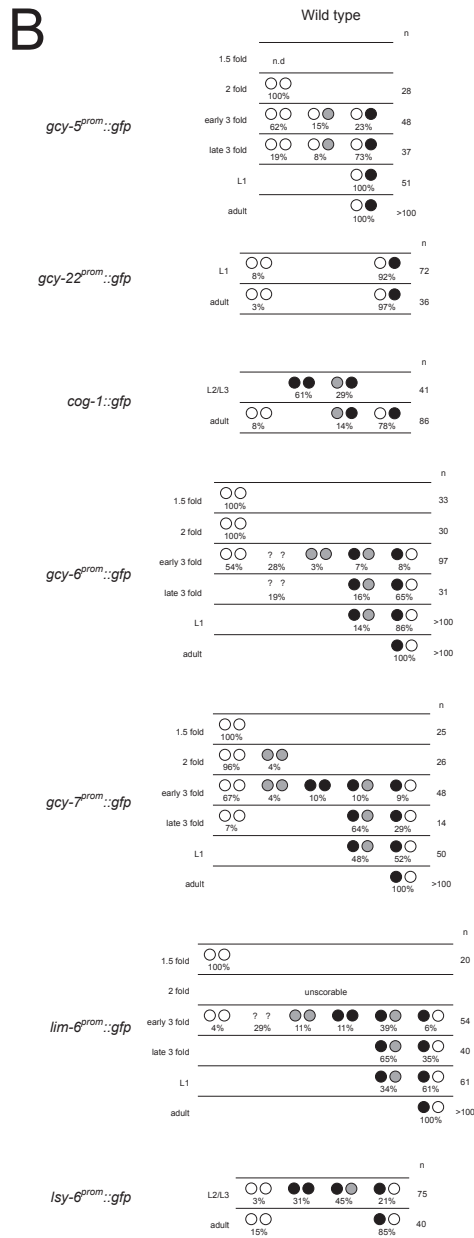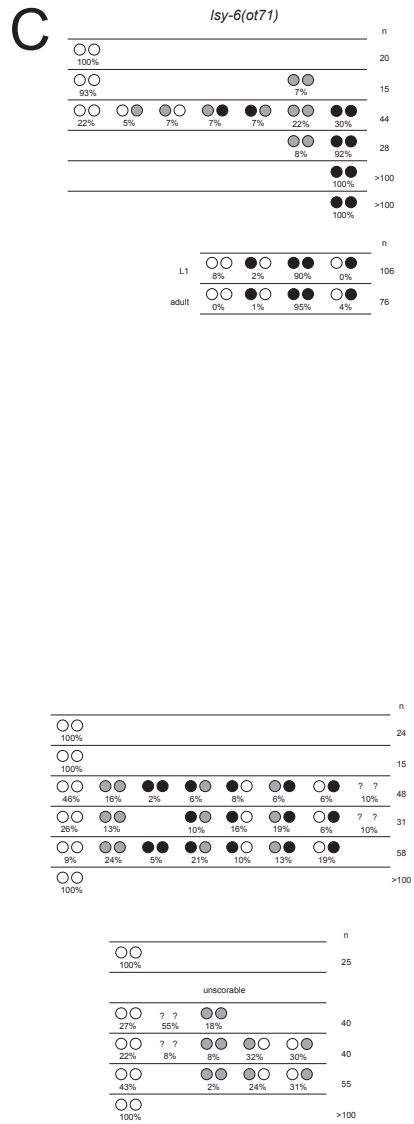

Supplement: pnas_0505530102_2.pdf [file pnas_0505530102_2.pdf]

*cog-1 prom:::gfp*

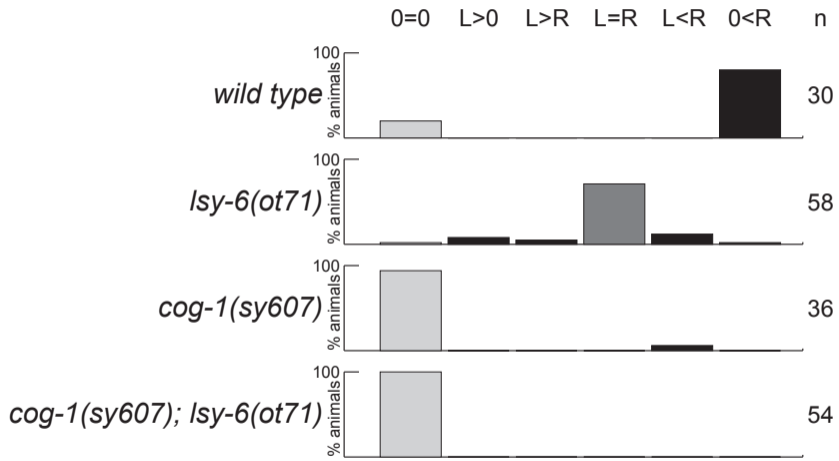

Supplement: pnas_0505530102_3.pdf [file pnas_0505530102_3.pdf]

A

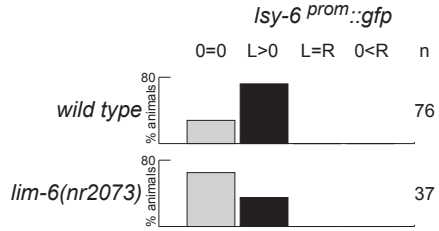

B

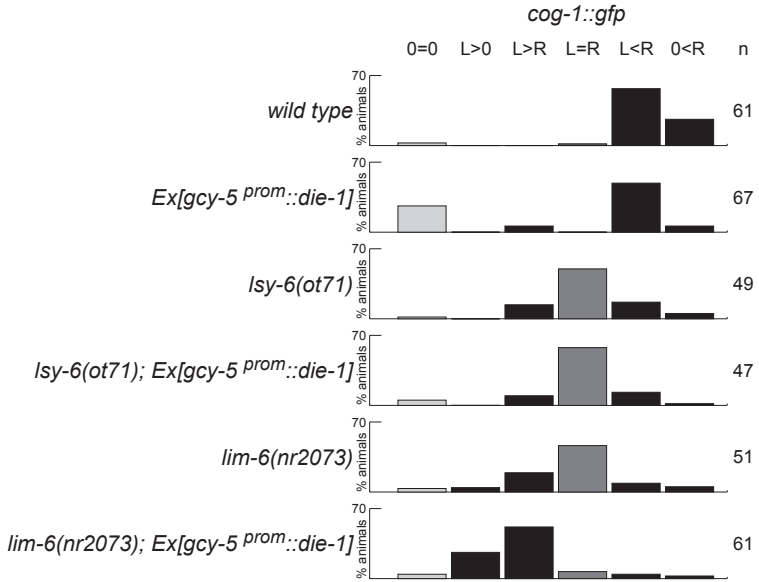

C

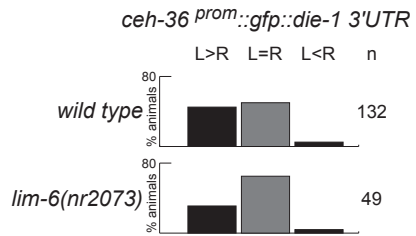

D

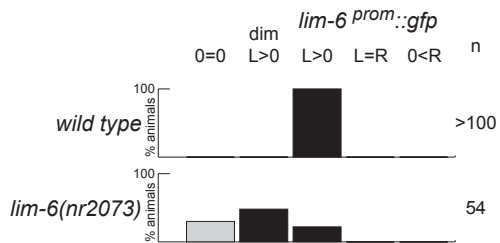

Supplement: pnas_0505530102_4.pdf [file pnas_0505530102_4.pdf]
